# Supplementary material for: Dietary Outcomes of the ‘Healthy Youngsters, Healthy Dads’ Randomised Controlled Trial
Source: Nutrients. 2021 Sep 22;13(10):3306. doi: 10.3390/nu13103306 (PMC8541030; doi:10.3390/nu13103306)
Supplement: Supplementary file 1 [file nutrients-13-03306-s001.zip › nutrients-1366718-supplementary.pdf]

# Supplementary Material

## Dietary outcomes of the 'Healthy Youngsters, Healthy Dads' Randomized Controlled Trial

Lee M Ashton, Philip J Morgan\*, Jacqueline Grounds, Myles D Young, Anna T Rayward, Alyce T. Barnes, Emma R. Pollock, Stevie-Lee Kennedy, Kristen L. Saunders Clare E Collins.

\*Correspondence: Philip.morgan@newcastle.edu.au; Tel.: +61-2-49-217265

### Contents

| Supporting information item                                                                                                          | Page |
|--------------------------------------------------------------------------------------------------------------------------------------|------|
| <b>Table S1.</b> Description of intervention components in the 'Healthy Youngsters, Healthy Dads' program                            | 2    |
| <b>Table S2.</b> Change in dietary intake of children enrolled in the Healthy Youngsters Healthy Dads (HYHD) RCT (Completers) n=82   | 4    |
| <b>Table S3.</b> Change in dietary intake of fathers enrolled in the Healthy Youngsters Healthy Dads (HYHD) RCT (completers) n=79    | 7    |
| <b>Table S4.</b> Change in dietary intake of children enrolled in the Healthy Youngsters Healthy Dads (HYHD) RCT (per-protocol) n=91 | 10   |
| <b>Table S5:</b> Change in dietary intake of fathers enrolled in the Healthy Youngsters Healthy Dads (HYHD) RCT (per-protocol) n=91  | 13   |

**Table S1.** Description of intervention components in the ‘Healthy Youngsters, Healthy Dads’ program

| Intervention component                         | Overview                                                                                                                                                                                                                                                                                                                                                                                                                                                                                                                                                                          | Detail                                                                                                                                                                                                                                                                                                                                                                                                                                                                                                                                                                                                                                                                                                                                                                                                                                                                                                                                                                       | Behaviour change techniques                                                                                                                                                                                                                                                                                                                                                                                                                                                         | Targeted theoretical mediators                                                                                                                                                                                                |
|------------------------------------------------|-----------------------------------------------------------------------------------------------------------------------------------------------------------------------------------------------------------------------------------------------------------------------------------------------------------------------------------------------------------------------------------------------------------------------------------------------------------------------------------------------------------------------------------------------------------------------------------|------------------------------------------------------------------------------------------------------------------------------------------------------------------------------------------------------------------------------------------------------------------------------------------------------------------------------------------------------------------------------------------------------------------------------------------------------------------------------------------------------------------------------------------------------------------------------------------------------------------------------------------------------------------------------------------------------------------------------------------------------------------------------------------------------------------------------------------------------------------------------------------------------------------------------------------------------------------------------|-------------------------------------------------------------------------------------------------------------------------------------------------------------------------------------------------------------------------------------------------------------------------------------------------------------------------------------------------------------------------------------------------------------------------------------------------------------------------------------|-------------------------------------------------------------------------------------------------------------------------------------------------------------------------------------------------------------------------------|
| ‘Fathers-only’ workshop                        | <ul style="list-style-type: none"> <li>2 x 2hours delivered by a trained facilitator with physical education qualifications.</li> <li>Held on the Thursday evenings before and after the first father-and-child session.</li> </ul>                                                                                                                                                                                                                                                                                                                                               | <p>Topics covered:</p> <ul style="list-style-type: none"> <li>Optimising health in the early years</li> <li>The unique and powerful influence of fathers</li> <li>Positive parenting strategies</li> <li>SMART goal setting</li> <li>Physical activity parenting</li> <li>Fundamental movement skills</li> <li>Healthy eating for families</li> <li>Screen-time parenting</li> </ul>                                                                                                                                                                                                                                                                                                                                                                                                                                                                                                                                                                                         | <ul style="list-style-type: none"> <li>Social support (practical, emotional)</li> <li>Increase positive emotions</li> <li>Instructions on how to perform the behaviour</li> <li>Information about consequences (health, social and environmental, emotional)</li> <li>Demonstration of the behaviour</li> <li>Graded tasks</li> <li>Credible source</li> <li>Identification of self as role model</li> <li>Framing/reframing</li> <li>Verbal persuasion about capability</li> </ul> | <ul style="list-style-type: none"> <li>Social support/relatedness (SCT/SDT)</li> <li>Autonomy (SDT)</li> <li>Self-efficacy/perceived competence (SCT/SDT)</li> <li>Outcome expectations (SCT)</li> <li>Goals (SCT)</li> </ul> |
| Weekly group sessions for fathers and children | <ul style="list-style-type: none"> <li>8 x weekly 75-minute sessions (20-minute <i>Education session</i> plus 55-minute <i>Practical session</i>).</li> <li>Mothers/partners and siblings invited to attend week 5 session.</li> <li>Four facilitators were trained to deliver the program, and each session was delivered by two facilitators. All facilitators had education qualifications.</li> <li>Participants were offered one of three Saturday morning timeslots, delivered by two facilitators. Some facilitators delivered more than one session each week.</li> </ul> | <p><i>Education session:</i></p> <ul style="list-style-type: none"> <li>Icebreakers and overview of weekly focus which alternated between physical activity (e.g. rough and tumble play, sport skills) and healthy eating (e.g. vegetables, fruit).</li> <li>Each week introduced a new animal character and a slogan.</li> </ul> <p><i>Practical session:</i></p> <ul style="list-style-type: none"> <li>Designed to increase preschool-aged children’s motivation and skills to engage in physical activity fun and active father-child games.</li> <li>Each session targeted rough and tumble play (15 min), sport skills (i.e., FMS) (15 min), and aerobic and muscular fitness (15 min). There was a cool-down component (5 mins) at the end of every session and transition time was accounted for (5 mins).</li> <li>Seven sports skills targeted (2/week): catch, kick, one-handed strike, two-handed strike, bounce, overhand throw and underhand throw.</li> </ul> |                                                                                                                                                                                                                                                                                                                                                                                                                                                                                     |                                                                                                                                                                                                                               |

|                    |                                                                                                                                                                                                                                                                                                                                                                                                                                                                                                      |                                                                                                                                                                                                                                                                                                                                                                                                                                                                                                                                                                                                                                 |                                                                                                                                                                                                                                                                                                    |                                                                                                                                                                                             |
|--------------------|------------------------------------------------------------------------------------------------------------------------------------------------------------------------------------------------------------------------------------------------------------------------------------------------------------------------------------------------------------------------------------------------------------------------------------------------------------------------------------------------------|---------------------------------------------------------------------------------------------------------------------------------------------------------------------------------------------------------------------------------------------------------------------------------------------------------------------------------------------------------------------------------------------------------------------------------------------------------------------------------------------------------------------------------------------------------------------------------------------------------------------------------|----------------------------------------------------------------------------------------------------------------------------------------------------------------------------------------------------------------------------------------------------------------------------------------------------|---------------------------------------------------------------------------------------------------------------------------------------------------------------------------------------------|
| Home-based program | <ul style="list-style-type: none"> <li>• Activity Handbook containing a range of engaging activities, challenges and sport skills.</li> <li>• One Yamax SW200 <i>pedometer</i> to assist with monitoring step counts.</li> <li>• Sticker chart to earn the animal sticker of the week (e.g. Charlie the Chimpanzee) for one home challenge and bonus stickers for completing more than one activity (e.g. apple, basketball).</li> <li>• One home challenge task was minimum requirement.</li> </ul> | <p>Fathers asked to use Activity Handbook each week and record completed home tasks:</p> <ul style="list-style-type: none"> <li>• Home challenges based on weekly theme (e.g., sock wrestle)</li> <li>• Sport skill games (e.g., capture the target)</li> <li>• Step count monitoring (using pedometer)</li> <li>• Co-physical activity (<math>\geq</math> 10-minute bouts)</li> <li>• SMART goals relating to physical activity, healthy eating, screen time and parenting</li> <li>• Review SMART goal progress</li> <li>• Dad task (e.g. bring at least one piece of fruit with you to work every day this week.)</li> </ul> | <ul style="list-style-type: none"> <li>• Material incentive</li> <li>• Instructions on how to perform the behaviour</li> <li>• Graded tasks</li> <li>• Prompts/cues</li> <li>• Increase positive emotions</li> <li>• Goal setting</li> <li>• Action planning</li> <li>• Self-monitoring</li> </ul> | <ul style="list-style-type: none"> <li>• Goals (SCT)</li> <li>• Social support/relatedness (SCT/SDT)</li> <li>• Autonomy</li> <li>• Self-efficacy/perceived competence (SCT/SDT)</li> </ul> |
|--------------------|------------------------------------------------------------------------------------------------------------------------------------------------------------------------------------------------------------------------------------------------------------------------------------------------------------------------------------------------------------------------------------------------------------------------------------------------------------------------------------------------------|---------------------------------------------------------------------------------------------------------------------------------------------------------------------------------------------------------------------------------------------------------------------------------------------------------------------------------------------------------------------------------------------------------------------------------------------------------------------------------------------------------------------------------------------------------------------------------------------------------------------------------|----------------------------------------------------------------------------------------------------------------------------------------------------------------------------------------------------------------------------------------------------------------------------------------------------|---------------------------------------------------------------------------------------------------------------------------------------------------------------------------------------------|

---

Abbreviations: SCT = social cognitive theory; SDT = self-determination theory; FMS= fundamental movement skills; SMART = Specific, Measurable, Achievable, Relevant, Timely

**Table S2:** Change in dietary intake of children enrolled in the Healthy Youngsters Healthy Dads (HYHD) RCT (Completers) n=82

|                                                                                 |                                                  |              | Baseline      | 10 weeks change from baseline<br>(Mean, 95% CI) |                                                |                                        | 9 months change from baseline<br>(Mean, 95% CI) |                                                   |                                        |
|---------------------------------------------------------------------------------|--------------------------------------------------|--------------|---------------|-------------------------------------------------|------------------------------------------------|----------------------------------------|-------------------------------------------------|---------------------------------------------------|----------------------------------------|
| Outcome                                                                         | NRV [1-4]                                        | Group        | Mean (SE)     | Within group <sup>a</sup>                       | Mean difference<br>between groups <sup>b</sup> | <i>p</i> -value<br>[Cohen's <i>d</i> ] | Within group <sup>c</sup>                       | Mean difference<br>between<br>groups <sup>b</sup> | <i>p</i> -value<br>[Cohen's <i>d</i> ] |
| Energy<br>(kJ/day) <sup>*d,e</sup>                                              | -                                                | Intervention | 6013 (360)    | -469 (-1033, 94)                                | -285 (-1113, 543)                              | .495 [0.15]                            | +509 (-326, 1344)                               | <b>-946 (-2172, 281)</b>                          | <b>.013 [0.34]</b>                     |
|                                                                                 |                                                  | Control      | 5815 (387)    | -184 (-790, 422)                                |                                                |                                        | +1454 (556, 2353)                               |                                                   |                                        |
| <i>Diet Quality Score (max score is 73, higher score = better diet quality)</i> |                                                  |              |               |                                                 |                                                |                                        |                                                 |                                                   |                                        |
| Total ARFS                                                                      | -                                                | Intervention | 31.2 (1.4)    | +0.9 (-0.7, 2.4)                                | +0.4 (-1.9, 2.7)                               | .737 [0.07]                            | +0.6 (0.9, 2.2)                                 | +0.7 (-1.6, 3.0)                                  | .548 [0.13]                            |
|                                                                                 |                                                  | Control      | 33.4 (1.5)    | +0.5 (-1.2, 2.2)                                |                                                |                                        | -0.1 (-1.7, 1.6)                                |                                                   |                                        |
| <i>Macronutrients (% of total energy intake or g/day)</i>                       |                                                  |              |               |                                                 |                                                |                                        |                                                 |                                                   |                                        |
| Protein (%)                                                                     | AMDR: 15-25%                                     | Intervention | 16.6 (0.3)    | +0.2 (-0.3, 0.7)                                | +0.4 (-0.4, 1.1)                               | .340 [0.21]                            | +0.2 (-0.3, 0.7)                                | +0.5 (-0.3, 1.2)                                  | .197 [0.29]                            |
|                                                                                 |                                                  | Control      | 16.8 (0.3)    | -0.2 (-0.7, 0.4)                                |                                                |                                        | -0.3 (-0.8, 0.3)                                |                                                   |                                        |
| Carbohydrate<br>(%)                                                             | AMDR: 45-65%                                     | Intervention | 46.9 (0.8)    | 0.0 (-1.1, 1.1)                                 | -0.9 (-2.4, 0.7)                               | .274 [0.24]                            | +0.7 (-0.6, 2.0)                                | -0.8 (-2.7, 1.1)                                  | .397 [0.19]                            |
|                                                                                 |                                                  | Control      | 46.8 (0.9)    | +0.9 (-0.3, 2.0)                                |                                                |                                        | +1.5 (0.1, 2.9)                                 |                                                   |                                        |
| Total sugars<br>(g/day) <sup>d</sup>                                            | -                                                | Intervention | 91.0 (5.6)    | -8.6 (-19.2, 2.0)                               | -7.6 (-23.1, 8.0)                              | .340 [0.21]                            | 4.2 (-6.4, 14.8)                                | -9.4(-24.9, 6.2)                                  | .237 [0.26]                            |
|                                                                                 |                                                  | Control      | 86.0 (6.0)    | -1.1 (-12.5, 10.3)                              |                                                |                                        | 13.6 (2.2, 25.0)                                |                                                   |                                        |
| Fat (%)                                                                         | AMDR: 20-35%                                     | Intervention | 37.0(0.7)     | -0.5 (-1.4, 0.4)                                | +0.5 (-0.8, 1.87)                              | .439 [0.17]                            | <b>-1.3 (-2.5, -0.1)</b>                        | +0.3 (-1.4, 2.0)                                  | .720 [0.08]                            |
|                                                                                 |                                                  | Control      | 36.8 (0.7)    | -1.0 (-2.0, -0.4)                               |                                                |                                        | <b>-1.6 (-2.9, -0.4)</b>                        |                                                   |                                        |
| Sat fat (%) <sup>d</sup>                                                        | <10%                                             | Intervention | 16.4 (0.4)    | -0.5 (-1.2, 0.2)                                | +0.2 (-0.7, 1.2)                               | .636[0.11]                             | -1.0 (-1.7, -0.4)                               | -0.1 (-1.1, 0.9)                                  | .844 [0.04]                            |
|                                                                                 |                                                  | Control      | 16.0 (0.4)    | -0.7 (-1.5, 0.0)                                |                                                |                                        | -0.9 (-0.9, 0.5)                                |                                                   |                                        |
| <i>Micronutrients</i>                                                           |                                                  |              |               |                                                 |                                                |                                        |                                                 |                                                   |                                        |
| Fibre (g/day) <sup>d</sup>                                                      | AI: 14g (aged 3yrs, 18g (aged 4-5 yrs)           | Intervention | 17.1 (1.1)    | -0.4 (-2.2, 1.4)                                | -0.7 (-3.3, 2.0)                               | .602 [0.12]                            | +3.3 (0.5, 6.0)                                 | -2.5 (-6.5, 1.51)                                 | .218 [0.27]                            |
|                                                                                 |                                                  | Control      | 17.4 (1.2)    | +0.3 (-1.6, 2.2)                                |                                                |                                        | +5.8 (2.8, 8.7)                                 |                                                   |                                        |
| Sodium<br>(mg/day) <sup>d</sup>                                                 | AI: 200-400mg (aged 3yrs), 300-600 (aged 4-5yrs) | Intervention | 1290.8 (79.6) | <b>-123.7 (-245.2, -2.3)</b>                    | -102.4 (-280.8, 76.0)                          | .257 [0.25]                            | +109.7 (-72.8, 292.2)                           | <b>-290.1 (-558.3, -21.9)</b>                     | <b>.034 [0.48]</b>                     |
|                                                                                 |                                                  | Control      | 1222.6 (85.7) | -21.3 (-152.0, 109.382)                         |                                                |                                        | +399.8 (203.4, 596.2)                           |                                                   |                                        |
| <i>Healthy, nutrient dense core foods (% of total energy intake)</i>            |                                                  |              |               |                                                 |                                                |                                        |                                                 |                                                   |                                        |
| Core foods                                                                      | ≥85%                                             | Intervention | 71.5 (1.6)    | <b>+3.7 (1.6, 5.7)</b>                          | +2.9 (-0.1, 5.9)                               | .056 [0.43]                            | +1.8 (-0.3, 3.8)                                | +3.0 (0.0, 5.9)                                   | .053 [0.43]                            |
|                                                                                 |                                                  | Control      | 72.7 (1.7)    | +0.7 (-1.5, 2.9)                                |                                                |                                        | -1.2 (-3.4, 1.0)                                |                                                   |                                        |

|                                                                           |                   |              |            |                          |                          |                    |                          |                          |                    |
|---------------------------------------------------------------------------|-------------------|--------------|------------|--------------------------|--------------------------|--------------------|--------------------------|--------------------------|--------------------|
| Vegetables <sup>f</sup>                                                   | -                 | Intervention | 6.5 (0.7)  | +0.6 (-0.4, 1.6)         | +0.5 (-0.9, 2.0)         | .486 [0.15]        | +0.1 (-0.9, 1.1)         | +0.4 (-1.1, 1.8)         | .607[0.11]         |
|                                                                           |                   | Control      | 7.7 (0.7)  | -0.1 (-1.0, 1.1)         |                          |                    | -0.3 (-1.4, 0.8)         |                          |                    |
| Fruit                                                                     | -                 | Intervention | 10.1 (0.7) | <b>+1.5 (0.1, 2.8)</b>   | -0.2 (-2.1, 1.8)         | .878 [0.03]        | +1.3 (-0.1, 2.6)         | +0.8 (-1.1, 2.8)         | .398 [0.19]        |
|                                                                           |                   | Control      | 9.8 (0.8)  | <b>+1.6 (0.2, 3.0)</b>   |                          |                    | +0.4 (-1.0, 1.8)         |                          |                    |
| Meats <sup>d</sup>                                                        | -                 | Intervention | 7.9 (0.7)  | +0.6 (-0.6, 1.9)         | +0.1 (-1.8, 2.0)         | .907 [0.03]        | +0.7 (-0.7, 2.0)         | +0.5 (-1.3, 2.4)         | .582 [0.12]        |
|                                                                           |                   | Control      | 8.2 (0.7)  | +0.5 (-0.8, 1.9)         |                          |                    | +0.2 (-1.2, 1.5)         |                          |                    |
| Vegetarian protein sources                                                | -                 | Intervention | 2.9 (0.4)  | +0.1 (-0.5, 0.8)         |                          | .567 [0.13]        | +0.2 (-0.5, 0.8)         |                          |                    |
|                                                                           |                   | Control      | 3.0 (0.5)  | +0.1 (-0.8, 0.5)         | +0.3 (-0.7, 1.2)         |                    | -0.1 (-0.8, 0.5)         | +0.3 (-0.6, 1.2)         | .534 [0.14]        |
| Grains <sup>d</sup>                                                       | -                 | Intervention | 18.6 (1.0) | +1.2 (-0.8, 3.3)         | +0.8 (-2.2, 3.7)         | .620 [0.11]        | +2.3 (0.3, 4.4)          | -0.1 (-3.1, 2.9)         | .946 [0.01]        |
|                                                                           |                   | Control      | 20.0 (1.1) | +0.5 (-1.7, 2.7)         |                          |                    | +2.4 (0.2, 4.6)          |                          |                    |
| Breakfast cereals                                                         | -                 | Intervention | 9.0 (0.8)  | +0.6 (-1.0, 2.2)         | +0.4 (-2.0, 2.7)         | .768 [0.07]        | +1.0 (-0.6, 2.6)         | +1.3 (-1.1, 3.7)         | .284 [0.24]        |
|                                                                           |                   | Control      | 9.1 (0.9)  | +0.2 (-1.5, 2.0)         |                          |                    | -0.3 (-2.0, 1.5)         |                          |                    |
| Dairy <sup>d</sup>                                                        | -                 | Intervention | 27.8 (1.5) | -0.7 (-3.4, 2.0)         | +1.1 (-2.9, 5.1)         | .584 [0.11]        | -3.3 (-6.0, -0.6)        | +0.4 (-3.6, 4.4)         | .829 [0.05]        |
|                                                                           |                   | Control      | 26.3 (1.6) | -1.8 (-4.7, 1.1)         |                          |                    | -3.7 (-6.6, -0.8)        |                          |                    |
| <i>Energy-dense nutrient-poor (EDNP) foods (% of total energy intake)</i> |                   |              |            |                          |                          |                    |                          |                          |                    |
| EDNP foods                                                                | <1 serve (~5-20%) | Intervention | 28.5 (1.6) | <b>-3.7 (-5.7, -1.6)</b> | -2.9 (-5.9, -0.1)        | .056 [0.43]        | -1.8 (-3.8, 0.3)         | -3.0 (-5.9, -0.0)        | .053 [0.43]        |
|                                                                           |                   | Control      | 27.3 (1.7) | -0.7 (-2.9, 1.5)         |                          |                    | +1.2 (-1.0, 3.4)         |                          |                    |
| Sugar-sweetened beverages                                                 | -                 | Intervention | 0.9 (0.3)  | -0.1 (-0.5, 0.3)         |                          | .785 [0.06]        | -0.1 (-0.5, 0.3)         |                          |                    |
|                                                                           |                   | Control      | 0.7 (0.3)  | -0.0 (-0.5, 0.3)         | -0.1 (-0.7, 0.5)         |                    | -0.1 (-0.5, 0.4)         | -0.0 (-0.6, 0.6)         | .968 [0.01]        |
| Prepacked snacks                                                          | -                 | Intervention | 3.7 (0.5)  | <b>-1.4 (-2.2, -0.6)</b> | <b>-1.6 (-2.8, -0.4)</b> | <b>.009 [0.59]</b> | <b>-1.4 (-2.2, -0.6)</b> | <b>-2.3 (-3.4, -1.1)</b> | <b>.000 [0.83]</b> |
|                                                                           |                   | Control      | 3.0 (0.5)  | -0.2 (-0.7, 1.1)         |                          |                    | <b>+0.9 (0.0, 1.8)</b>   |                          |                    |
| Confectionary                                                             | -                 | Intervention | 4.9 (0.5)  | <b>-1.0 (-1.9, -0.1)</b> | -0.3 (-1.6, 1.0)         | .635 [0.11]        | -0.3 (-1.2, 0.5)         | +0.3 (-1.0, 1.6)         | .630 [0.11]        |
|                                                                           |                   | Control      | 5.2 (0.6)  | -0.7 (-1.7, 0.3)         |                          |                    | -0.7 (-0.9, 0.3)         |                          |                    |
| Baked products                                                            | -                 | Intervention | 5.3 (0.5)  | <b>-0.9 (-1.8, 0.0)</b>  | -0.7 (-2.0, 0.6)         | .279 [0.24]        | -0.7 (-1.5, 0.2)         | -0.6 (-1.9, 0.7)         | .350 [0.21]        |
|                                                                           |                   | Control      | 5.1 (0.5)  | -0.2 (-1.1, 0.7)         |                          |                    | -0.1 (-1.0, 0.9)         |                          |                    |
| Takeaway/fast foods <sup>d</sup>                                          | -                 | Intervention | 6.4 (0.6)  | 0.0 (-0.9, 0.8)          | -0.5 (-1.7, 0.8)         | .459 [0.16]        | <b>+1.0 (-0.2, 1.9)</b>  | -0.7 (-1.9, +0.6)        | .294 [0.23]        |
|                                                                           |                   | Control      | 6.0 (0.6)  | +0.4 (-0.5, 1.3)         |                          |                    | +1.7 (+0.8, 2.6)         |                          |                    |
| Condiments                                                                | -                 | Intervention | 3.1 (0.3)  | +0.1 (-0.6, 0.8)         | 0.00 (-1.0, 1.0)         | .981 [0.01]        | -0.3 (-0.9, 0.4)         | -0.1 (-1.1, 0.9)         | .851 [0.04]        |
|                                                                           |                   | Control      | 2.8 (0.3)  | +0.1 (-0.6, 0.8)         |                          |                    | -0.2 (-0.9, 0.6)         |                          |                    |
| Fatty meats                                                               | -                 | Intervention | 1.8 (0.2)  | 0.0 (-0.4, 0.5)          | 0.0 (-0.6, 0.7)          | .945 [0.02]        | +0.2 (-0.2, 0.6)         | +0.3 (-0.4, 0.9)         | .432 [0.17]        |
|                                                                           |                   | Control      | 1.7 (0.3)  | 0.0 (-0.5, 0.5)          |                          |                    | -0.1 (-0.5, 0.4)         |                          |                    |
| <i>Meals (% of total energy intake)</i>                                   |                   |              |            |                          |                          |                    |                          |                          |                    |

|                         |   |              |           |                  |                  |             |                  |                  |             |
|-------------------------|---|--------------|-----------|------------------|------------------|-------------|------------------|------------------|-------------|
| Meals with              | - | Intervention | 5.2 (0.6) | +0.6 (-0.4, 1.7) | +0.1 (-1.4, 1.7) | .886 [0.03] | 0.0 (-1.1, 1.0)  | -0.0 (-1.6, 1.5) | .951 [0.01] |
| vegetables <sup>g</sup> |   | Control      | 5.1 (0.6) | +0.5 (-0.6, 1.6) |                  |             | 0.0 (-1.1, 1.2)  |                  |             |
| Meals without           | - | Intervention | 1.6 (0.3) | -0.2 (-0.8, 0.4) | +0.1 (-0.9, 1.0) | .906 [0.03] | +0.3 (-0.3, 0.9) | +0.5 (-0.4, 1.4) | .256 [0.25] |
| vegetables <sup>h</sup> |   | Control      | 1.7 (0.3) | -0.2 (-0.9, 0.4) |                  |             | -0.2 (-0.9, 0.5) |                  |             |

Bold denotes a significant difference. \*1 kcal = 4.186 kJ. a. 10 week value minus baseline; b. Within-group difference (intervention) minus within-group difference (control); c. 9 month value minus baseline; d. Adjusted for child's age; e. Truncated to account for outliers [5] (>3.29 SD truncated to next highest value plus 1); f. Adjusted for child's sex; g. composite score of all protein meals that were consumed with vegetables, h. composite score of all protein meals that were consumed without vegetables; ARFS; Australian Recommended Food Score, NRV; Nutrient Reference Value, AMDR; Acceptable Macronutrient Distribution Ranges, AI; Acceptable Intake

**Table S3:** Change in dietary intake of fathers enrolled in the Healthy Youngsters Healthy Dads (HYHD) RCT (completers) n=79

| Outcome                                                                         | NRV [2-4,6]                          | Group        | Baseline    | 10 weeks change from baseline<br>(Mean, 95% CI) |                                   |                        | 9 months change from baseline<br>(Mean, 95% CI) |                                   |                        |
|---------------------------------------------------------------------------------|--------------------------------------|--------------|-------------|-------------------------------------------------|-----------------------------------|------------------------|-------------------------------------------------|-----------------------------------|------------------------|
|                                                                                 |                                      |              | Mean (SE)   | Within group                                    | Mean difference<br>between groups | p-value<br>[Cohen's d] | Within group                                    | Mean difference<br>between groups | p-value<br>[Cohen's d] |
| Energy (kJ day) <sup>*d,e</sup>                                                 | -                                    | Intervention | 10512 (510) | <b>-1092 (-1770, 413)</b>                       | -912 (-1890, +66)                 | .067 [0.41]            | <b>-701 (-1379, -22)</b>                        | -892 (-1869, +86)                 | .074 [0.41]            |
|                                                                                 |                                      | Control      | 10780 (530) | -180 (-884, 525)                                |                                   |                        | +191 (-514, +895)                               |                                   |                        |
| <i>Diet Quality Score (max score is 73, higher score = better diet quality)</i> |                                      |              |             |                                                 |                                   |                        |                                                 |                                   |                        |
| Total ARFS                                                                      | -                                    | Intervention | 32.9 (1.4)  | +0.9 (-1.1, 2.9)                                | +1.2 (-1.7, 4.1)                  | .415 [0.18]            | +0.7 (-1.3, 2.7)                                | +2.0 (-0.9, 4.9)                  | .178 [0.30]            |
|                                                                                 |                                      | Control      | 34.1 (1.4)  | -0.3 (-2.4, 1.8)                                |                                   |                        | -1.3 (-3.4, 0.8)                                |                                   |                        |
| <i>Macronutrients (% of total energy intake)</i>                                |                                      |              |             |                                                 |                                   |                        |                                                 |                                   |                        |
| Protein                                                                         | AMDR: 15-25%                         | Intervention | 17.1 (0.5)  | +0.7 (-0.2, 1.6)                                | +0.8 (-0.5, 2.0)                  | .217 [0.28]            | +0.7 (-0.2, 1.5)                                | +0.6 (-0.6, 1.9)                  | .320 [0.22]            |
|                                                                                 |                                      | Control      | 17.2 (0.5)  | -0.1 (-1.0, 0.8)                                |                                   |                        | 0.0 (-0.9, 0.9)                                 |                                   |                        |
| Carbohydrate                                                                    | AMDR: 45-65%                         | Intervention | 43.7 (1.1)  | +0.6 (-1.0, 2.3)                                | -0.1 (-2.4, 2.3)                  | .967 [0.01]            | -0.0 (-1.7, 1.7)                                | +0.3 (-2.1, 2.7)                  | .778 [0.06]            |
|                                                                                 |                                      | Control      | 44.0 (1.1)  | +0.7 (-1.0, 2.4)                                |                                   |                        | -0.4 (-2.1, 1.4)                                |                                   |                        |
| Fat                                                                             | AMDR: 20-35%                         | Intervention | 36.4 (0.9)  | -0.9 (-2.3, 0.5)                                | -0.3 (-2.3, 1.7)                  | .786 [0.06]            | -0.6 (-2.0, 0.8)                                | -0.5 (-2.5, 1.5)                  | .615 [0.11]            |
|                                                                                 |                                      | Control      | 36.6 (0.9)  | -0.6 (-2.0, 0.8)                                |                                   |                        | -0.1 (-1.5, 1.3)                                |                                   |                        |
| Saturated fat                                                                   | <10%                                 | Intervention | 13.4 (0.4)  | -0.5 (-1.3, 0.2)                                | -0.4 (-1.5, 0.7)                  | .454 [0.17]            | -0.4 (-1.1, 0.3)                                | -0.7 (-1.8, 0.3)                  | .177 [0.31]            |
|                                                                                 |                                      | Control      | 13.8 (0.4)  | +0.1 (-0.9, 0.6)                                |                                   |                        | +0.3 (-0.4, 1.1)                                |                                   |                        |
| Alcohol                                                                         | -                                    | Intervention | 3.0 (0.5)   | <b>-0.8 (-1.4, -0.3)</b>                        | -0.8 (-1.6, 0.1)                  | .073 [0.41]            | -0.2 (-1.5, 1.1)                                | -0.8 (-2.7, 1.1)                  | .389 [0.45]            |
|                                                                                 |                                      | Control      | 2.3 (0.5)   | -0.1 (-0.7, 0.5)                                |                                   |                        | +0.6 (-0.7, 2.0)                                |                                   |                        |
| <i>Micronutrients</i>                                                           |                                      |              |             |                                                 |                                   |                        |                                                 |                                   |                        |
| Fibre (g/day) <sup>d</sup>                                                      | AI: 30g/day (male aged 19-70y)       | Intervention | 31.6 (1.6)  | -0.1 (-2.0, 1.9)                                |                                   |                        | -0.0 (-3.9, 3.8)                                |                                   |                        |
|                                                                                 |                                      | Control      | 32.8 (1.7)  | +0.5 (-1.5, 2.5)                                | -0.5 (-3.3, 2.2)                  | .703 [0.09]            | +1.4 (-2.7, 5.4)                                | -1.4 (-7.0, 4.2)                  | .617 [0.11]            |
| Sodium (mg/day)                                                                 | SDT: <2000mg/day (male aged 19-70y). | Intervention | 2257 (125)  | <b>-316 (-469, -165)</b>                        |                                   |                        | -205 (-683, 274)                                |                                   |                        |
|                                                                                 |                                      | Control      | 2369 (129)  | -51 (-208, 107)                                 | <b>-266 (-485, -46.9)</b>         | .018 [0.54]            | +211 (-286, 708)                                | -416 (-1105, 274)                 | .234 [0.27]            |
| <i>Healthy, nutrient dense core foods (% of total energy intake)</i>            |                                      |              |             |                                                 |                                   |                        |                                                 |                                   |                        |
| Core foods                                                                      | ≥85%                                 | Intervention | 60.5 (1.8)  | <b>+5.8 (3.1, 8.5)</b>                          | <b>+3.91 (0.0, 7.8)</b>           |                        | <b>+4.2 (1.6, 6.9)</b>                          | +3.1 (-0.8, 6.9)                  | .120 [0.35]            |

|                                                                           |                    |              |            |                          |                         |                    |                          |                         |                    |
|---------------------------------------------------------------------------|--------------------|--------------|------------|--------------------------|-------------------------|--------------------|--------------------------|-------------------------|--------------------|
|                                                                           |                    | Control      | 61.7 (1.9) | +1.9 (-0.9, 4.7)         |                         | <b>.047 [0.45]</b> | +1.2 (-1.6, 4.0)         |                         |                    |
| Vegetables                                                                | -                  | Intervention | 8.8 (0.7)  | <b>+1.1 (0.1, 2.1)</b>   | +0.6 (-0.8, 2.1)        | .402 [0.19]        | +0.8 (-0.2, 1.8)         | +0.5 (-0.9, 2.0)        | .468 [0.16]        |
|                                                                           |                    | Control      | 7.9 (0.7)  | +0.5 (-0.6, 1.5)         |                         |                    | +0.3 (-0.8, 1.3)         |                         |                    |
| Fruit                                                                     | -                  | Intervention | 6.5 (0.7)  | <b>+1.7 (0.5, 2.9)</b>   | +1.4 (0.3, 3.1)         | .116 [0.36]        | +0.2 (-1.0, 1.4)         | +0.3 (-1.4, 2.0)        | .730 [0.08]        |
|                                                                           |                    | Control      | 6.2 (0.7)  | +0.4 (-0.9, 1.6)         |                         |                    | -0.1 (-1.3, 1.2)         |                         |                    |
| Meats                                                                     | -                  | Intervention | 13.6 (1.1) | +1.4 (-0.8, 3.5)         | +2.0 (-1.1, 5.1)        | .204 [0.29]        | +0.6 (-1.5, 2.8)         | +1.3 (-1.8, 4.4)        | .420 [0.18]        |
|                                                                           |                    | Control      | 13.4 (1.1) | -0.6 (-2.8, 1.6)         |                         |                    | -0.6 (-2.9, 1.6)         |                         |                    |
| Vegetarian protein sources                                                | -                  | Intervention | 4.2 (0.5)  | -0.2 (-1.0, 0.5)         | -0.1 (-1.2, 1.0)        | .875 [0.04]        | -0.5 (-1.3, 0.2)         | -0.7 (-1.8, 0.4)        | .215 [0.28]        |
|                                                                           |                    | Control      | 3.4 (0.5)  | -0.1 (-0.9, 0.7)         |                         |                    | +0.2 (-0.5, 1.1)         |                         |                    |
| Grains                                                                    | -                  | Intervention | 19.0 (1.3) | +1.3 (-0.9, 3.5)         | +0.3 (-2.9, 3.5)        | .843 [0.04]        | <b>+3.2 (1.0, 5.4)</b>   | <b>+4.4 (1.2, 7.6)</b>  | <b>.007 [0.62]</b> |
|                                                                           |                    | Control      | 21.4 (1.3) | +1.0 (-1.3, 3.3)         |                         |                    | -1.2 (-3.5, 1.1)         |                         |                    |
| Breakfast cereals                                                         | -                  | Intervention | 5.4 (0.8)  | +0.5 (-0.6, 1.7)         | +0.3 (-1.9, 1.4)        | .764 [0.07]        | +1.0 (-0.2, 2.1)         | +1.5 (-0.1, 3.2)        | .069 [0.41]        |
|                                                                           |                    | Control      | 6.7 (0.8)  | +0.8 (-0.4, 2.0)         |                         |                    | -0.6 (-1.7, 0.6)         |                         |                    |
| Dairy                                                                     | -                  | Intervention | 8.2 (1.0)  | +0.3 (-1.8, 2.3)         | -0.6 (-3.6, 2.3)        | .676 [0.09]        | 0.0 (-2.1, 2.0)          | -2.2 (-5.2, 0.7)        | .138 [0.34]        |
|                                                                           |                    | Control      | 9.8 (1.0)  | +0.9 (-1.2, 3.0)         |                         |                    | <b>+2.2 (0.1, 4.3)</b>   |                         |                    |
| <i>Energy-dense nutrient-poor (EDNP) foods (% of total energy intake)</i> |                    |              |            |                          |                         |                    |                          |                         |                    |
| EDNP foods                                                                | <3 serves (~5-20%) | Intervention | 39.5 (1.8) | <b>-5.8 (-8.5, -3.1)</b> |                         | <b>.047 [0.45]</b> | <b>-4.2 (-6.9, -1.6)</b> | -3.1 (-6.9, 0.8)        | .120 [0.35]        |
|                                                                           |                    | Control      | 38.0 (1.9) | -1.9 (-4.7, 0.9)         | <b>-3.9 (-7.8, 0.0)</b> |                    | -1.2 (-4.0, 1.6)         |                         |                    |
| Sugar-sweetened beverages                                                 | -                  | Intervention | 2.4 (0.5)  | 0.0 (-0.8, 0.8)          | +0.0 (-1.2, 1.2)        | .966 [0.01]        | <b>-0.8 (-1.5, -0.1)</b> | -0.3 (-1.3, 0.6)        | .500 [0.15]        |
|                                                                           |                    | Control      | 1.5 (0.5)  | 0.0 (-0.9, 0.9)          |                         |                    | -0.5 (-1.2, 0.2)         |                         |                    |
| Prepacked snacks                                                          | -                  | Intervention | 3.5 (0.4)  | -0.4 (-1.2, 0.4)         | -0.7 (-1.8, 0.4)        | .219 [0.28]        | -0.1 (-0.9, 0.7)         | -0.7 (-1.8, 0.5)        | .257 [0.26]        |
|                                                                           |                    | Control      | 2.5 (0.4)  | +0.3 (-0.5, 1.1)         |                         |                    | +0.6 (-0.3, 1.4)         |                         |                    |
| Confectionary                                                             | -                  | Intervention | 6.6 (0.7)  | <b>-2.0 (-3.2, -0.8)</b> | -1.6 (-3.3, -0.2)       | .079 [0.40]        | <b>-1.9 (-3.1, -0.7)</b> | <b>-1.7 (-3.5, 0.0)</b> | <b>.049 [0.45]</b> |
|                                                                           |                    | Control      | 6.3 (0.7)  | -0.4 (-1.7, 0.8)         |                         |                    | -0.2 (-1.4, 1.1)         |                         |                    |
| Baked products                                                            | -                  | Intervention | 4.6 (0.6)  | 0.0 (-1.0, 0.9)          | -0.3 (-1.7, 1.1)        | .633 [0.11]        | 0.0 (-1.0, 0.9)          | -0.3 (-1.7, 1.1)        | .714 [0.08]        |
|                                                                           |                    | Control      | 4.8 (0.6)  | +0.3 (-0.7, 1.3)         |                         |                    | +0.2 (-0.8, 1.2)         |                         |                    |
| Takeaway/ fast foods                                                      | -                  | Intervention | 10.9 (1.2) | -1.2 (-2.7, 0.4)         | +0.4 (-1.9, 2.7)        | .721 [0.08]        | -1.0 (-2.3, 0.4)         | +0.2 (-1.7, 2.1)        | .828 [0.05]        |
|                                                                           |                    | Control      | 12.1 (1.3) | -1.6 (-3.2, 0.1)         |                         |                    | -1.2 (-2.5, 0.2)         |                         |                    |
| Condiments                                                                | -                  | Intervention | 3.5 (0.4)  | <b>-0.8 (-1.5, 0.1)</b>  | -0.5 (-1.6, 0.5)        | .303 [0.23]        | -0.6 (-1.3, 0.1)         | -0.6 (-1.6, 0.5)        | .268 [0.25]        |
|                                                                           |                    | Control      | 3.4 (0.4)  | -0.2 (-1.0, 0.5)         |                         |                    | 0.0 (-0.7, 0.7)          |                         |                    |
| Fatty meats                                                               | -                  | Intervention | 2.7 (0.3)  | -0.1 (-0.6, 0.3)         | -0.0 (-0.7, 0.6)        | .901 [0.03]        | 0.0 (-0.4, 0.5)          | +0.7 (-0.0, 1.4)        | .055 [0.44]        |
|                                                                           |                    | Control      | 2.8 (0.3)  | -0.1 (-0.6, 0.4)         |                         |                    | <b>-0.6 (-1.1, -0.1)</b> |                         |                    |

|                                                                                                                                                                                                                                                                                                                                                                                                                                                                                                                                                                                                                                                                              |   |              |           |                  |                  |             |                  |                  |             |
|------------------------------------------------------------------------------------------------------------------------------------------------------------------------------------------------------------------------------------------------------------------------------------------------------------------------------------------------------------------------------------------------------------------------------------------------------------------------------------------------------------------------------------------------------------------------------------------------------------------------------------------------------------------------------|---|--------------|-----------|------------------|------------------|-------------|------------------|------------------|-------------|
| <i>Meals (% of total energy intake)</i>                                                                                                                                                                                                                                                                                                                                                                                                                                                                                                                                                                                                                                      |   |              |           |                  |                  |             |                  |                  |             |
| Meals with                                                                                                                                                                                                                                                                                                                                                                                                                                                                                                                                                                                                                                                                   | - | Intervention | 8.6 (0.8) | +1.2 (-0.3, 2.7) |                  | .155 [0.32] | +0.8 (-0.7, 2.3) | +1.5 (-0.7, 3.6) | .183 [0.30] |
| vegetables (%) <sup>f</sup>                                                                                                                                                                                                                                                                                                                                                                                                                                                                                                                                                                                                                                                  |   |              |           |                  | +1.6 (-0.6, 3.7) |             |                  |                  |             |
|                                                                                                                                                                                                                                                                                                                                                                                                                                                                                                                                                                                                                                                                              |   | Control      | 8.6 (0.8) | -0.4 (-2.0, 1.2) |                  |             | -0.7 (-2.2, 0.9) |                  |             |
| Meals without                                                                                                                                                                                                                                                                                                                                                                                                                                                                                                                                                                                                                                                                | - | Intervention | 2.6 (0.6) | -0.2 (-1.3, 0.9) |                  | .983 [0.00] | -0.5 (-1.6, 0.6) | -0.2 (-1.8, 1.4) | .829 [0.04] |
| vegetables (%) <sup>g</sup>                                                                                                                                                                                                                                                                                                                                                                                                                                                                                                                                                                                                                                                  |   |              |           |                  | +0.0 (-1.6, 1.6) |             |                  |                  |             |
|                                                                                                                                                                                                                                                                                                                                                                                                                                                                                                                                                                                                                                                                              |   | Control      | 2.7 (0.6) | -0.2 (-1.4, 0.9) |                  |             | -0.3 (-1.5, 0.8) |                  |             |
| Bold denotes a significant difference. *1 kcal = 4.186 kJ.a. 10 week value minus baseline; b. Within-group difference (intervention) minus within-group difference (control); c. 9 month value minus baseline; d. Adjusted for SES, e. Truncated to account for outliers [5] (>3.29 SD truncated to next highest value plus 1) ; f. composite score of all protein meals that were consumed with vegetables, g. composite score of all protein meals that were consumed without vegetables; ARFS; Australian Recommended Food Score, NRV; Nutirent Reference Value, AMDR; Acceptable Macronutrient Distribution Ranges, AI; Acceptable Intake, SDT: Suggested Dietary Target |   |              |           |                  |                  |             |                  |                  |             |

**Table S4:** Change in dietary intake of children enrolled in the Healthy Youngsters Healthy Dads (HYHD) RCT (per-protocol) n=91

| Outcome                                                                         | NRV [1-4]                                        | Group        | Baseline   | 10 weeks change from baseline<br>(Mean, 95% CI) |                                                |                                        | 9 months change from baseline<br>(Mean, 95% CI) |                                                   |                                        |
|---------------------------------------------------------------------------------|--------------------------------------------------|--------------|------------|-------------------------------------------------|------------------------------------------------|----------------------------------------|-------------------------------------------------|---------------------------------------------------|----------------------------------------|
|                                                                                 |                                                  |              | Mean (SE)  | Within group <sup>a</sup>                       | Mean difference<br>between groups <sup>b</sup> | <i>p</i> -value<br>[Cohen’s <i>d</i> ] | Within group <sup>c</sup>                       | Mean difference<br>between<br>groups <sup>b</sup> | <i>p</i> -value<br>[Cohen’s <i>d</i> ] |
| Energy<br>(kJ/day)* <sup>d, e</sup>                                             | -                                                | Intervention | 6144 (441) | -338 (-1331, 655)                               | -610 (-1859, 638)                              | .336 [0.20]                            | +739 (-254, 1732)                               | -1151 (-2403, -101)                               | .071 [0.38]                            |
|                                                                                 |                                                  | Control      | 5727 (312) | +272 (-484, 1029)                               |                                                |                                        | +1890 (1128, 2652)                              |                                                   |                                        |
| <i>Diet Quality Score (max score is 73, higher score = better diet quality)</i> |                                                  |              |            |                                                 |                                                |                                        |                                                 |                                                   |                                        |
| Total ARFS                                                                      | -                                                | Intervention | 30.6 (1.7) | +1.8 (-0.1, 3.7)                                | +1.1 (-1.4, 3.5)                               | .386 [0.18]                            | +1.5 (-0.4, 3.4)                                | +1.2 (-1.3, 3.6)                                  | .348 [0.20]                            |
|                                                                                 |                                                  | Control      | 34.2 (1.2) | +0.8 (-0.7, 2.2)                                |                                                |                                        | 0.4 (-1.1, 1.9)                                 |                                                   |                                        |
| <i>Macronutrients (% of total energy intake or g/day)</i>                       |                                                  |              |            |                                                 |                                                |                                        |                                                 |                                                   |                                        |
| Protein (%)                                                                     | AMDR: 15-25%                                     | Intervention | 16.1 (0.4) | +0.6 (-0.0, 1.2)                                | +0.7 (-0.1, 1.5)                               | .078 [0.37]                            | +0.3 (-0.3, 0.9)                                | +0.4 (-0.4, 1.2)                                  | .284 [0.23]                            |
|                                                                                 |                                                  | Control      | 16.7 (0.3) | -0.1 (-0.6, 0.4)                                |                                                |                                        | -0.1 (-0.6, 0.4)                                |                                                   |                                        |
| Carbohydrate<br>(%)                                                             | AMDR: 45-65%                                     | Intervention | 47.8 (0.9) | -0.5 (-2.0, 0.9)                                | -1.6 (-3.4, 0.3)                               | .094 [0.35]                            | +0.6 (-0.9, 2.1)                                | -0.8 (-2.7, 1.0)                                  | .374 [0.19]                            |
|                                                                                 |                                                  | Control      | 46.9 (0.6) | <b>+1.0 (0.3, 2.6)</b>                          |                                                |                                        | <b>+1.4 (0.3, 2.6)</b>                          |                                                   |                                        |
| Total sugars<br>(g/day) <sup>d</sup>                                            |                                                  | Intervention | 94.1 (7.3) | -5.4 (19.0, 8.2)                                | -10.9 (-28.1, 6.3)                             | .211 [0.26]                            | +7.9 (-5.7, 21.5)                               | -10.9 (-28.1, 6.4)                                | .214 [0.26]                            |
|                                                                                 |                                                  | Control      | 85.3 (5.2) | 5.6 (-4.9, 16.0)                                |                                                |                                        | <b>+18.8 (8.3, 29.4)</b>                        |                                                   |                                        |
| Fat (%)                                                                         | AMDR: 20-35%                                     | Intervention | 36.8 (0.8) | -0.2 (-1.3, 0.8)                                | +1.0 (-0.4, 2.3)                               | .153 [0.30]                            | -1.3 (-2.8, 0.2)                                | +0.3 (-1.6, 2.2)                                  | .766 [0.06]                            |
|                                                                                 |                                                  | Control      | 36.9 (0.6) | <b>-1.2 (-2.0, -0.3)</b>                        |                                                |                                        | <b>-1.6 (-2.7, -0.5)</b>                        |                                                   |                                        |
| Sat fat (%)                                                                     | <10%                                             | Intervention | 16.3 (0.5) | -0.2 (-1.0, 0.6)                                | +0.6 (-0.5, 1.6)                               | .269 [0.23]                            | <b>-1.3 (-2.1, -0.5)</b>                        | -0.2 (-1.3, 0.8)                                  | .645 [0.10]                            |
|                                                                                 |                                                  | Control      | 16.1 (0.3) | <b>-0.8 (-1.4, -0.1)</b>                        |                                                |                                        | <b>-1.0 (-1.7, -0.4)</b>                        |                                                   |                                        |
| <i>Micronutrients</i>                                                           |                                                  |              |            |                                                 |                                                |                                        |                                                 |                                                   |                                        |
| Fibre (g/day) <sup>d</sup>                                                      | AI: 14g (aged 3yrs), 18g (aged 4-5 yrs)          | Intervention | 18.2 (1.7) | -0.8 (-4.1, 2.6)                                | -2.4 (-6.6, 1.9)                               | .273 [0.23]                            | <b>+3.5 (0.1, 6.8)</b>                          | -3.3 (-7.5, -1.0)                                 | .133 [0.32]                            |
|                                                                                 |                                                  | Control      | 17.2 (1.2) | +1.6 (-1.0, 4.1)                                |                                                |                                        | <b>+6.7 (4.1, 9.3)</b>                          |                                                   |                                        |
| Sodium<br>(mg/day) <sup>d</sup>                                                 | AI: 200-400mg (aged 3yrs), 300-600 (aged 4-5yrs) | Intervention | 1364 (104) | <b>-131 (-342, 80)</b>                          | -201 (-467, -65)                               | .137 [0.31]                            | +148 (-63, 359)                                 | <b>-347 (-614, -81)</b>                           | <b>.011 [0.54]</b>                     |
|                                                                                 |                                                  | Control      | 1227 (73)  | +70 (-91, 232)                                  |                                                |                                        | <b>+495 (333, 658)</b>                          |                                                   |                                        |
| <i>Healthy, nutrient dense core foods (% of total energy intake)</i>            |                                                  |              |            |                                                 |                                                |                                        |                                                 |                                                   |                                        |
| Core foods                                                                      | ≥85%                                             | Intervention | 69.7 (1.8) | <b>+3.1 (0.6, 5.5)</b>                          | +2.3 (-0.9, 5.4)                               | .155 [0.30]                            | +1.1 (-1.4, 3.6)                                | +2.4 (-0.8, 5.5)                                  | .142 [0.31]                            |
|                                                                                 |                                                  | Control      | 72.9 (1.3) | +0.8 (-1.1, 2.7)                                |                                                |                                        | -1.3 (-3.2, 0.7)                                |                                                   |                                        |
| Vegetables                                                                      | -                                                | Intervention | 6.0 (0.8)  | +0.9 (-0.3, 2.1)                                | +1.0 (-0.5, 2.6)                               |                                        | +0.4 (-0.8, 1.6)                                | +0.6 (-0.9, 2.2)                                  | .438 [0.16]                            |

|                                                                           |                   |              |            |                          |                  |             |                          |                          |                    |
|---------------------------------------------------------------------------|-------------------|--------------|------------|--------------------------|------------------|-------------|--------------------------|--------------------------|--------------------|
|                                                                           |                   | Control      | 7.2 (0.6)  | -0.2 (-1.1, 0.8)         |                  | .186 [0.28] | -0.2 (-1.2, 0.8)         |                          |                    |
| Fruit                                                                     | -                 | Intervention | 9.7 (0.9)  | +0.8 (-0.7, 2.3)         | -0.9 (-2.7, 1.0) | .371 [0.19] | +0.8 (-0.7, 2.3)         | +0.5 (-1.4, 2.3)         | .637 [0.10]        |
|                                                                           |                   | Control      | 9.9 (0.7)  | <b>+1.7 (0.5, 2.9)</b>   |                  |             | +0.3 (-0.8, 1.5)         |                          |                    |
| Meats                                                                     | -                 | Intervention | 7.0 (0.8)  | +1.3 (-0.3, 2.9)         | +0.9 (-1.0, 2.9) | .357 [0.19] | +0.9 (-0.6, 2.5)         | +0.8 (-1.2, 2.7)         | .443 [0.16]        |
|                                                                           |                   | Control      | 7.7 (0.6)  | +0.4 (-0.8, 1.6)         |                  |             | +0.2 (-1.0, 1.4)         |                          |                    |
| Vegetarian protein sources                                                | -                 | Intervention | 2.7 (0.5)  | -0.0 (-0.8, 0.7)         |                  | .856 [0.04] | +0.4 (-0.4, 1.2)         |                          |                    |
|                                                                           |                   | Control      | 3.1 (0.4)  | +0.1 (-0.5, 0.7)         | +0.1 (-1.0, 0.9) |             | +0.1 (-0.5, 0.6)         | +0.4 (-0.6, 1.3)         | .472 [0.15]        |
| Grains <sup>d</sup>                                                       | -                 | Intervention | 19.8 (1.2) | -0.5 (-3.1, 2.1)         | -1.2 (-4.4, 2.1) | .481 [0.15] | +1.9 (-0.7, 4.5)         | -0.5 (-3.8, 2.7)         | .749 [0.07]        |
|                                                                           |                   | Control      | 19.9 (0.9) | +0.6 (-1.3, 2.6)         |                  |             | <b>+2.4 (0.4, 4.4)</b>   |                          |                    |
| Breakfast cereals                                                         | -                 | Intervention | 9.7 (1.0)  | -0.9 (-2.9, 1.1)         | -0.6 (-3.1, 1.9) | .649 [0.10] | +0.3 (-1.7, 2.3)         | +0.8 (-1.7, 3.3)         | .525 [0.13]        |
|                                                                           |                   | Control      | 9.3 (0.7)  | -0.3 (-1.8, 1.2)         |                  |             | -0.5 (-2.1, 1.0)         |                          |                    |
| Dairy <sup>d</sup>                                                        | -                 | Intervention | 27.1 (1.7) | 0.0 (-3.4, 3.3)          | +1.9 (-2.3, 6.1) | .368 [0.19] | <b>-4.3 (-7.6, -0.9)</b> | -0.3 (-1.8, 5.4)         | .879 [0.03]        |
|                                                                           |                   | Control      | 27.5 (1.2) | -1.9 (-4.5, 0.6)         |                  |             | <b>-3.9 (-6.5, -1.4)</b> |                          |                    |
| <i>Energy-dense nutrient-poor (EDNP) foods (% of total energy intake)</i> |                   |              |            |                          |                  |             |                          |                          |                    |
| EDNP foods                                                                | <1 serve (~5-20%) | Intervention | 30.3 (1.8) | <b>-3.1 (-5.5, -0.6)</b> | -2.3 (-5.4, 0.9) | .155 [0.30] | <b>-1.1 (-3.6, 1.4)</b>  | -2.4 (-5.5, 0.8)         | .142 [0.31]        |
|                                                                           |                   | Control      | 27.1 (1.3) | -0.8 (-2.7, 1.1)         |                  |             | +1.3 (-0.7, 3.2)         |                          |                    |
| Sugar-sweetened beverages                                                 | -                 | Intervention | 0.7 (0.2)  | +0.2 (-0.2, 0.6)         |                  | .586 [0.11] | +0.2 (-0.2, 0.6)         |                          |                    |
|                                                                           |                   | Control      | 0.6 (0.2)  | +0.1 (-0.3, 0.4)         | +0.1 (-0.4, 0.6) |             | -0.1 (-0.4, 0.3)         | +0.3 (-0.2, 0.8)         | .275 [0.23]        |
| Prepacked snacks                                                          | -                 | Intervention | 3.8 (0.6)  | <b>-1.4 (-2.4, -0.3)</b> | -1.2 (-2.5, 0.1) | .079 [0.37] | <b>-1.7 (-2.7, -0.6)</b> | <b>-2.2 (-3.5, -0.9)</b> | <b>.001 [0.70]</b> |
|                                                                           |                   | Control      | 3.0 (0.4)  | -0.2 (-1.0, 0.6)         |                  |             | +0.5 (-0.3, 1.4)         |                          |                    |
| Confectionary                                                             | -                 | Intervention | 5.5 (0.7)  | -0.7 (-1.7, 0.2)         | -0.3 (-1.4, 0.9) | .655 [0.09] | -0.2 (-1.6, 1.1)         | +0.3 (-1.4, 2.0)         | .693 [0.08]        |
|                                                                           |                   | Control      | 4.9 (0.5)  | -0.5 (-1.2, 0.2)         |                  |             | -0.6 (-1.6, 0.4)         |                          |                    |
| Baked products                                                            | -                 | Intervention | 5.8 (0.6)  | -0.9 (-2.0, 0.2)         | -0.7 (-2.1, 0.7) | .318 [0.21] | -0.6 (-1.7, 0.5)         | -0.6 (-2.0, 0.7)         | .353 [0.20]        |
|                                                                           |                   | Control      | 5.1 (0.4)  | -0.2 (-1.1, 0.6)         |                  |             | +0.1 (-0.8, 0.9)         |                          |                    |
| Takeaway <sup>d</sup>                                                     | -                 | Intervention | 6.9 (0.7)  | +0.2 (-0.9, 1.3)         | -0.2 (-1.6, 1.2) | .783 [0.06] | <b>+1.5 (+0.4, 2.6)</b>  | -0.3 (-1.7, 1.1)         | .652 [0.09]        |
|                                                                           |                   | Control      | 5.9 (0.5)  | +0.4 (-0.5, 1.2)         |                  |             | <b>+1.8 (1.0, 2.7)</b>   |                          |                    |
| Condiments                                                                | -                 | Intervention | 2.8 (0.4)  | +0.2 (-0.6, 1.0)         | +0.2 (-0.9, 1.2) | .754 [0.07] | 0.0 (-0.8, 0.8)          | +0.3 (-0.7, 1.3)         | .579 [0.12]        |
|                                                                           |                   | Control      | 3.1 (0.3)  | 0.0 (-0.6, 0.7)          |                  |             | -0.3 (-0.9, 0.4)         |                          |                    |
| Fatty meats                                                               | -                 | Intervention | 2.0 (0.3)  | -0.1 (-0.5, 0.3)         | +0.1 (-0.6, 0.4) | .760 [0.06] | +0.2 (-0.4, 0.7)         | +0.2 (-0.6, 0.9)         | .651 [0.10]        |
|                                                                           |                   | Control      | 1.8 (0.2)  | 0.0 (-0.3, 0.3)          |                  |             | 0.0 (-0.5, 0.4)          |                          |                    |
| <i>Meals (% of total energy intake)</i>                                   |                   |              |            |                          |                  |             |                          |                          |                    |

|                         |   |              |           |                        |                  |             |                  |                         |                    |
|-------------------------|---|--------------|-----------|------------------------|------------------|-------------|------------------|-------------------------|--------------------|
| Meals with              | - | Intervention | 4.2 (0.6) | <b>+1.3 (0.1, 2.5)</b> | +0.9 (-0.6, 2.4) | .257 [0.24] | +0.4 (-0.8, 1.6) | +0.1 (-1.4, 1.7)        | .849 [0.04]        |
| vegetables <sup>f</sup> |   | Control      | 4.7 (0.5) | +0.4 (-0.5, 1.3)       |                  |             | +0.3 (-0.7, 1.2) |                         |                    |
| Meals without           | - | Intervention | 1.6 (0.4) | -0.1 (-0.8, 0.6)       | +0.1 (-0.8, 1.0) | .757 [0.06] | +0.2 (-0.5, 0.9) | <b>+0.5 (-0.4, 1.4)</b> | <b>.249 [0.24]</b> |
| vegetables <sup>g</sup> |   | Control      | 1.6 (0.3) | -0.2 (-0.8, 0.3)       |                  |             | -0.3 (-0.9, 0.2) |                         |                    |

Bold denotes a significant difference. \*1 kcal = 4.186 kJ. a. 10 week value minus baseline; b. Within-group difference (intervention) minus within-group difference (control); c. 9 month value minus baseline; d. Adjusted for child's age; e. Truncated to account for outliers [5] (>3.29 SD truncated to next highest value plus; f. composite score of all protein meals that were consumed with vegetables, g. composite score of all protein meals that were consumed without vegetables; ARFS; Australian Recommended Food Score, NRV; Nutrient Reference Value, AMDR; Acceptable Macronutrient Distribution Ranges, AI; Acceptable Intake

**Table S5:** Change in dietary intake of fathers enrolled in the Healthy Youngsters Healthy Dads (HYHD) RCT (per-protocol) n=91

| Outcome                                                                         | NRV [2-4,6]                          | Group        | Baseline    | 10 weeks change from baseline<br>(Mean, 95% CI) |                                                |                                        | 9 months change from baseline<br>(Mean, 95% CI) |                                                |                                        |
|---------------------------------------------------------------------------------|--------------------------------------|--------------|-------------|-------------------------------------------------|------------------------------------------------|----------------------------------------|-------------------------------------------------|------------------------------------------------|----------------------------------------|
|                                                                                 |                                      |              | Mean (SE)   | Within group <sup>a</sup>                       | Mean difference<br>between groups <sup>b</sup> | <i>p</i> -value<br>[Cohen's <i>d</i> ] | Within group <sup>a</sup>                       | Mean difference<br>between groups <sup>b</sup> | <i>p</i> -value<br>[Cohen's <i>d</i> ] |
| Energy (kJ day) <sup>*, d</sup>                                                 | -                                    | Intervention | 11021 (595) | <b>-1392 (-2245, -539)</b>                      | <b>-1642 (-2718, -566)</b>                     | <b>.003 [0.63]</b>                     | -662 (-1524, 200)                               | <b>-1166 (-2237, -96)</b>                      | <b>.033 [0.45]</b>                     |
|                                                                                 |                                      | Control      | 10327 (414) | +250 (-406, 907)                                |                                                |                                        | +504 (-131, 1139)                               |                                                |                                        |
| <i>Diet Quality Score (max score is 73, higher score = better diet quality)</i> |                                      |              |             |                                                 |                                                |                                        |                                                 |                                                |                                        |
| Total ARFS                                                                      | -                                    | Intervention | 33.3 (1.6)  | +0.3 (-1.9, 2.6)                                | +0.7 (-2.2, 3.6)                               | .633 [0.10]                            | -1.3 (-3.6, 1.0)                                | +0.4 (-2.4, 3.3)                               | .768 [0.06]                            |
|                                                                                 |                                      | Control      | 34.5 (1.1)  | -0.4 (-2.1, 1.4)                                |                                                |                                        | <b>-1.8 (-3.5, -0.1)</b>                        |                                                |                                        |
| <i>Macronutrients (% of total energy intake)</i>                                |                                      |              |             |                                                 |                                                |                                        |                                                 |                                                |                                        |
| Protein                                                                         | AMDR: 15-25%                         | Intervention | 17.3 (0.5)  | +0.9 (0.2, 2.0)                                 | +0.8 (-0.5, 2.2)                               | .233 [0.25]                            | +0.9 (-0.2, 1.9)                                | +0.8 (-0.5, 2.2)                               | .226 [0.25]                            |
|                                                                                 |                                      | Control      | 17.1 (0.4)  | +0.1 (-0.8, 0.9)                                |                                                |                                        | 0.0 (-0.8, 0.8)                                 |                                                |                                        |
| Carbohydrate                                                                    | AMDR: 45-65%                         | Intervention | 44.0 (1.3)  | +0.6 (-1.4, 2.6)                                | +0.4 (-2.1, 2.9)                               | .761 [0.06]                            | -0.3 (-2.3, 1.8)                                | +0.5 (-2.0, 3.0)                               | .692 [0.08]                            |
|                                                                                 |                                      | Control      | 44.1 (0.9)  | +0.2 (-1.4, 1.7)                                |                                                |                                        | -0.8 (-2.3, 0.7)                                |                                                |                                        |
| Fat                                                                             | AMDR: 20-35%                         | Intervention | 35.3 (1.0)  | -0.6 (-2.4, 1.1)                                | -0.4 (-2.6, 1.7)                               | .684 [0.09]                            | -0.4 (-2.2, 1.3)                                | -0.5 (-2.7, 1.6)                               | .628 [0.10]                            |
|                                                                                 |                                      | Control      | 35.9 (0.7)  | -0.2 (-1.5, 1.1)                                |                                                |                                        | +0.1 (-1.2, 1.4)                                |                                                |                                        |
| Saturated fat                                                                   | <10%                                 | Intervention | 13.6 (0.5)  | -0.3 (-1.3, 0.6)                                | -0.4 (-1.5, 0.8)                               | .526 [0.13]                            | -0.3 (-1.3, 0.6)                                | -0.8 (-1.9, 0.4)                               | .182 [0.28]                            |
|                                                                                 |                                      | Control      | 13.3 (0.3)  | 0.0 (-0.7, 0.7)                                 |                                                |                                        | +0.5 (-0.2, 1.2)                                |                                                |                                        |
| Alcohol                                                                         | -                                    | Intervention | 3.7 (0.7)   | <b>-1.1 (-1.8, -0.5)</b>                        | -1.0 (-1.8, -0.1)                              | .022 [0.49]                            | -0.3 (-2.0, 1.4)                                | -1.1 (-3.2, 1.1)                               | .318 [0.21]                            |
|                                                                                 |                                      | Control      | 2.8 (0.5)   | -0.2 (-0.7, 0.3)                                |                                                |                                        | +0.8 (-0.5, 2.1)                                |                                                |                                        |
| <i>Micronutrients</i>                                                           |                                      |              |             |                                                 |                                                |                                        |                                                 |                                                |                                        |
| Fibre (g/day)                                                                   | AI: 30g/day (male aged 19-70y)       | Intervention | 31.1 (1.9)  | -1.1 (-3.6, 1.4)                                | -2.2 (-5.4, 0.9)                               | .163 [0.30]                            | +0.3 (-4.6, 5.2)                                | -1.6 (-7.7, 4.5)                               | .604 [0.11]                            |
|                                                                                 |                                      | Control      | 32.4 (1.3)  | +1.2 (-0.8, 3.1)                                |                                                |                                        | +1.9 (-1.8, 5.6)                                |                                                |                                        |
| Sodium (mg/day)                                                                 | SDT: <2000mg/day (male aged 19-70y). | Intervention | 2378 (143)  | <b>-398 (-207, -588)</b>                        | <b>-421 (-663, -179)</b>                       | <b>.001 [0.74]</b>                     | -201 (-815, 412)                                | -471 (-1239, 297)                              | .226 [0.26]                            |
|                                                                                 |                                      | Control      | 2230 (99)   | +24 (-125, 172)                                 |                                                |                                        | +270 (-193, 732)                                |                                                |                                        |
| <i>Core foods (% of total energy intake)</i>                                    |                                      |              |             |                                                 |                                                |                                        |                                                 |                                                |                                        |
| Core foods                                                                      | ≥85%                                 | Intervention | 61.3 (2.2)  | <b>+5.8 (2.4, 9.2)</b>                          | <b>+4.7 (0.4, 9.1)</b>                         |                                        | <b>+4.8 (1.3, 8.3)</b>                          | <b>+4.7 (0.4, 9.0)</b>                         | <b>.020 [0.45]</b>                     |

|                                                                      |                  |              |            |                          |                          |                    |                          |                          |                    |
|----------------------------------------------------------------------|------------------|--------------|------------|--------------------------|--------------------------|--------------------|--------------------------|--------------------------|--------------------|
|                                                                      |                  | Control      | 63.0 (1.6) | +1.1 (-1.6, 3.7)         |                          | <b>.033 [0.45]</b> | +0.1 (-2.4, 2.7)         |                          |                    |
| Vegetables                                                           | -                | Intervention | 7.7 (0.8)  | +1.2 (-0.1, 2.4)         | +0.7 (-0.8, 2.3)         | .362 [0.19]        | +0.7 (-0.6, 2.0)         | +0.3 (-1.3, 1.8)         | .749 [0.07]        |
|                                                                      |                  | Control      | 8.7 (0.5)  | +0.4 (-0.5, 1.4)         |                          |                    | +0.4 (-0.5, 1.4)         |                          |                    |
| Fruit <sup>e</sup>                                                   | -                | Intervention | 6.0 (0.8)  | <b>+1.5 (0.2, 2.9)</b>   | +1.4 (-0.3, 3.1)         | .110 [0.34]        | +0.4 (-1.0, 1.7)         | +0.6 (-1.1, 2.3)         | .498 [0.14]        |
|                                                                      |                  | Control      | 6.6 (0.5)  | +0.1 (-0.9, 1.2)         |                          |                    | -0.3 (-1.2, 0.8)         |                          |                    |
| Meats <sup>e</sup>                                                   | -                | Intervention | 14.3 (1.3) | +1.2 (-1.4, 3.9)         | +1.5 (-1.9, 4.7)         | .385 [0.18]        | +1.0 (-1.6, 3.6)         | +1.4 (-1.9, 4.7)         | .392 [0.18]        |
|                                                                      |                  | Control      | 13.4 (0.9) | -0.2 (-2.2, 1.8)         |                          |                    | -0.4 (-2.4, 1.5)         |                          |                    |
| Vegetarian protein sources                                           | -                | Intervention | 3.1 (0.6)  | 0.0 (-0.9, 0.9)          | +0.3 (-0.8, 1.4)         | .619 [0.10]        | -0.4 (-1.3, 0.5)         | -0.4 (-1.5, 0.7)         | .461 [0.15]        |
|                                                                      |                  | Control      | 3.6 (0.4)  | -0.3 (-0.9, 0.4)         |                          |                    | +0.1 (-0.6, 0.7)         |                          |                    |
| Grains <sup>e</sup>                                                  | -                | Intervention | 20.4 (1.5) | +0.8 (-2.0, 3.6)         | +0.5 (-3.0, 4.0)         | .789 [0.06]        | <b>+2.9 (0.1, 5.7)</b>   | <b>4.7 (1.2, 8.2)</b>    | <b>.009 [0.56]</b> |
|                                                                      |                  | Control      | 21.6 (1.1) | +0.4 (-1.8, 2.5)         |                          |                    | -1.8 (-3.7, 0.3)         |                          |                    |
| Breakfast cereals                                                    | -                | Intervention | 5.9 (1.0)  | +0.4 (-1.1, 1.9)         | +0.1 (-1.8, 2.1)         | .888 [0.03]        | +1.0 (-0.5, 2.6)         | <b>2.1 (0.1, 4.0)</b>    | <b>.036 [0.44]</b> |
|                                                                      |                  | Control      | 7.0 (0.7)  | +0.3 (-0.9, 1.4)         |                          |                    | -1.0 (-2.2, 0.1)         |                          |                    |
| Dairy                                                                | -                | Intervention | 9.5 (1.1)  | +0.6 (-1.9, 3.1)         | -0.1 (-3.3, 3.0)         | .929 [0.02]        | +0.1 (-2.4, 2.7)         | -1.5 (-4.6, 1.7)         | .354 [0.19]        |
|                                                                      |                  | Control      | 9.2 (0.8)  | +0.8 (-1.2, 2.7)         |                          |                    | +1.6 (-0.2, 3.5)         |                          |                    |
| <i>Healthy, nutrient dense core foods (% of total energy intake)</i> |                  |              |            |                          |                          |                    |                          |                          |                    |
| EDNP foods                                                           | <3 serves (~20%) | Intervention | 38.7 (2.2) | <b>-5.8 (-9.2, -2.4)</b> | <b>-4.7 (-9.1, -0.4)</b> | <b>.033 [0.45]</b> | <b>-4.8 (-8.3, -1.3)</b> | <b>-4.7 (-9.0, -0.4)</b> | <b>.033 [0.45]</b> |
|                                                                      |                  | Control      | 37.0 (1.6) | -1.1 (-3.7, 1.6)         |                          |                    | -0.1 (-2.7, 2.4)         |                          |                    |
| Sugar-sweetened beverages                                            | -                | Intervention | 2.5 (0.6)  | +0.5 (-0.5, 1.5)         | +0.5 (-0.8, 1.7)         | .446 [0.16]        | -0.8 (-1.5, 0.0)         | -0.2 (-1.1, 0.7)         | .672 [0.09]        |
|                                                                      |                  | Control      | 1.7 (0.4)  | 0.0 (-0.7, 0.8)          |                          |                    | <b>-0.6 (-1.1, 0.0)</b>  |                          |                    |
| Prepacked snacks                                                     | -                | Intervention | 3.1 (0.5)  | -0.5 (-1.3, 0.3)         | -0.7 (-1.7, 0.3)         | .190 [0.28]        | -0.4 (-1.2, 0.4)         | -0.9 (-1.9, 0.2)         | .099 [0.35]        |
|                                                                      |                  | Control      | 2.5 (0.3)  | +0.2 (-0.4, 0.8)         |                          |                    | +0.4 (-0.2, 1.1)         |                          |                    |
| Confectionary                                                        | -                | Intervention | 6.5 (0.9)  | <b>-2.0 (-3.5, -0.6)</b> | -1.5 (-3.4, 0.3)         | .047 [0.34]        | <b>-2.2 (-3.7, -0.7)</b> | <b>-2.1 (-3.9, -0.2)</b> | <b>.027 [0.47]</b> |
|                                                                      |                  | Control      | 5.8 (0.6)  | -0.5 (-1.6, 0.7)         |                          |                    | -0.1 (-1.2, 1.0)         |                          |                    |
| Baked products                                                       | -                | Intervention | 4.6 (0.7)  | -0.2 (-1.4, 1.0)         | -0.5 (-2.0, 1.0)         | .532 [0.13]        | 0.0 (-1.2, 1.2)          | -0.2 (-1.8, 1.2)         | .744 [0.07]        |
|                                                                      |                  | Control      | 4.4 (0.5)  | +0.3 (-0.6, 1.2)         |                          |                    | +0.3 (-0.6, 1.2)         |                          |                    |
| Takeaway / fast foods                                                | -                | Intervention | 10.0 (1.3) | -1.0 (-2.9, 0.8)         | 0.0 (-2.3, 2.4)          | .968 [0.01]        | -0.7 (-2.4, 0.9)         | -0.4 (-2.4, 1.7)         | .713 [0.08]        |
|                                                                      |                  | Control      | 11.3 (0.9) | -1.1 (-2.4, 0.3)         |                          |                    | -0.4 (-1.6, 0.8)         |                          |                    |
| Condiments                                                           | -                | Intervention | 3.1 (0.5)  | -0.9 (-1.8, 0.0)         | -1.0 (-2.2, 0.2)         | .094 [0.35]        | -0.4 (1.3, 0.5)          | -0.4 (-1.6, 0.8)         | .504 [0.14]        |
|                                                                      |                  | Control      | 3.4 (0.4)  | 0.1 (-0.6, 0.8)          |                          |                    | 0.0 (-0.7, 0.7)          |                          |                    |
| Fatty meats                                                          | -                | Intervention | 2.8 (0.3)  | 0.0 (-0.5, 0.6)          | -0.2 (-0.5, 0.9)         | .588 [0.11]        | -0.0 (-0.6, 0.6)         | 0.6 (-0.1, 1.3)          | .107 [0.34]        |
|                                                                      |                  | Control      | 2.7 (0.2)  | -0.1 (-0.5, 0.3)         |                          |                    | <b>-0.6 (-1.0, -0.2)</b> |                          |                    |
| <i>Meals (% of total energy intake)</i>                              |                  |              |            |                          |                          |                    |                          |                          |                    |

|                             |   |              |           |                  |                  |             |                  |                  |             |
|-----------------------------|---|--------------|-----------|------------------|------------------|-------------|------------------|------------------|-------------|
| Meals with                  | - | Intervention | 8.9 (0.9) | +1.0 (-0.9, 2.8) | 1.2 (-1.1, 3.5)  | .320 [0.21] | +0.9 (-1.0, 2.7) | +1.4 (-0.9, 3.7) | .242 [0.25] |
| vegetables (%) <sup>f</sup> |   | Control      | 8.7 (0.6) | -0.2 (-1.6, 1.2) |                  |             | -0.6 (-1.9, 0.8) |                  |             |
| Meals without               | - | Intervention | 3.0 (0.7) | -0.0 (-1.4, 1.3) | -0.1 (-1.8, 1.6) | .910 [0.02] | -0.1 (-1.3, 1.4) | 0.0 (-1.7, 1.7)  | .997 [0.00] |
| vegetables (%) <sup>g</sup> |   | Control      | 2.5 (0.5) | +0.1 (-1.0, 1.1) |                  |             | +0.1 (-0.9, 1.1) |                  |             |

Bold denotes a significant difference. \*1 kcal = 4.186 kJ. a. 10 week value minus baseline; b. Within-group difference (intervention) minus within-group difference (control); c. 9 month value minus baseline; d. Truncated to account for outliers [5] (>3.29 SD truncated to next highest value plus 1) e. Adjusted for father's age; f. composite score of all protein meals that were consumed with vegetables, g. composite score of all protein meals that were consumed without vegetables; ARFS; Australian Recommended Food Score, NRV; Nutrient Reference Value, AMDR; Acceptable Macronutrient Distribution Ranges, AI; Acceptable Intake, SDT: Suggested Dietary Target

1. Eat for Health. Recommended number of serves for children, adolescents and toddlers. Available online: <https://www.eatforhealth.gov.au/food-essentials/how-much-do-we-need-each-day/recommended-number-serves-children-adolescents-and> (accessed on May 25th).
2. National Health and Medical Research Council. Nutrient Reference Values for Australia and New Zealand: Macronutrient balance. Available online: <https://www.nrv.gov.au/chronic-disease/macronutrient-balance> (accessed on May 25th).
3. National Health and Medical Research Council. Nutrient Reference Values for Australia and New Zealand: Sodium. Available online: <https://www.nrv.gov.au/nutrients/sodium> (accessed on May 25th).
4. National Health and Medical Research Council. Nutrient Reference Values for Australia and New Zealand: Dietary Fibre Available online: <https://www.nrv.gov.au/nutrients/dietary-fibre> (accessed on May 25th).
5. Tabachnick BG FL. *Using Multivariate Statistic*. 3rd ed. ; Allyn & Bacon: Boston, MA.; 2001.
6. Eat for Health. Recommended number of serves for adults. Available online: <https://www.eatforhealth.gov.au/food-essentials/how-much-do-we-need-each-day/recommended-number-serves-adults> (accessed on May 25th).
